# Supplementary material for: Acetyl-CoA synthetase regulates histone acetylation and hippocampal memory
Source: Springer Nature journal article supplement (doi:10.1038/nature22405), 2017-05-31

SUPPLEMENTARY INFORMATION | ORIGINAL WESTERN BLOTS

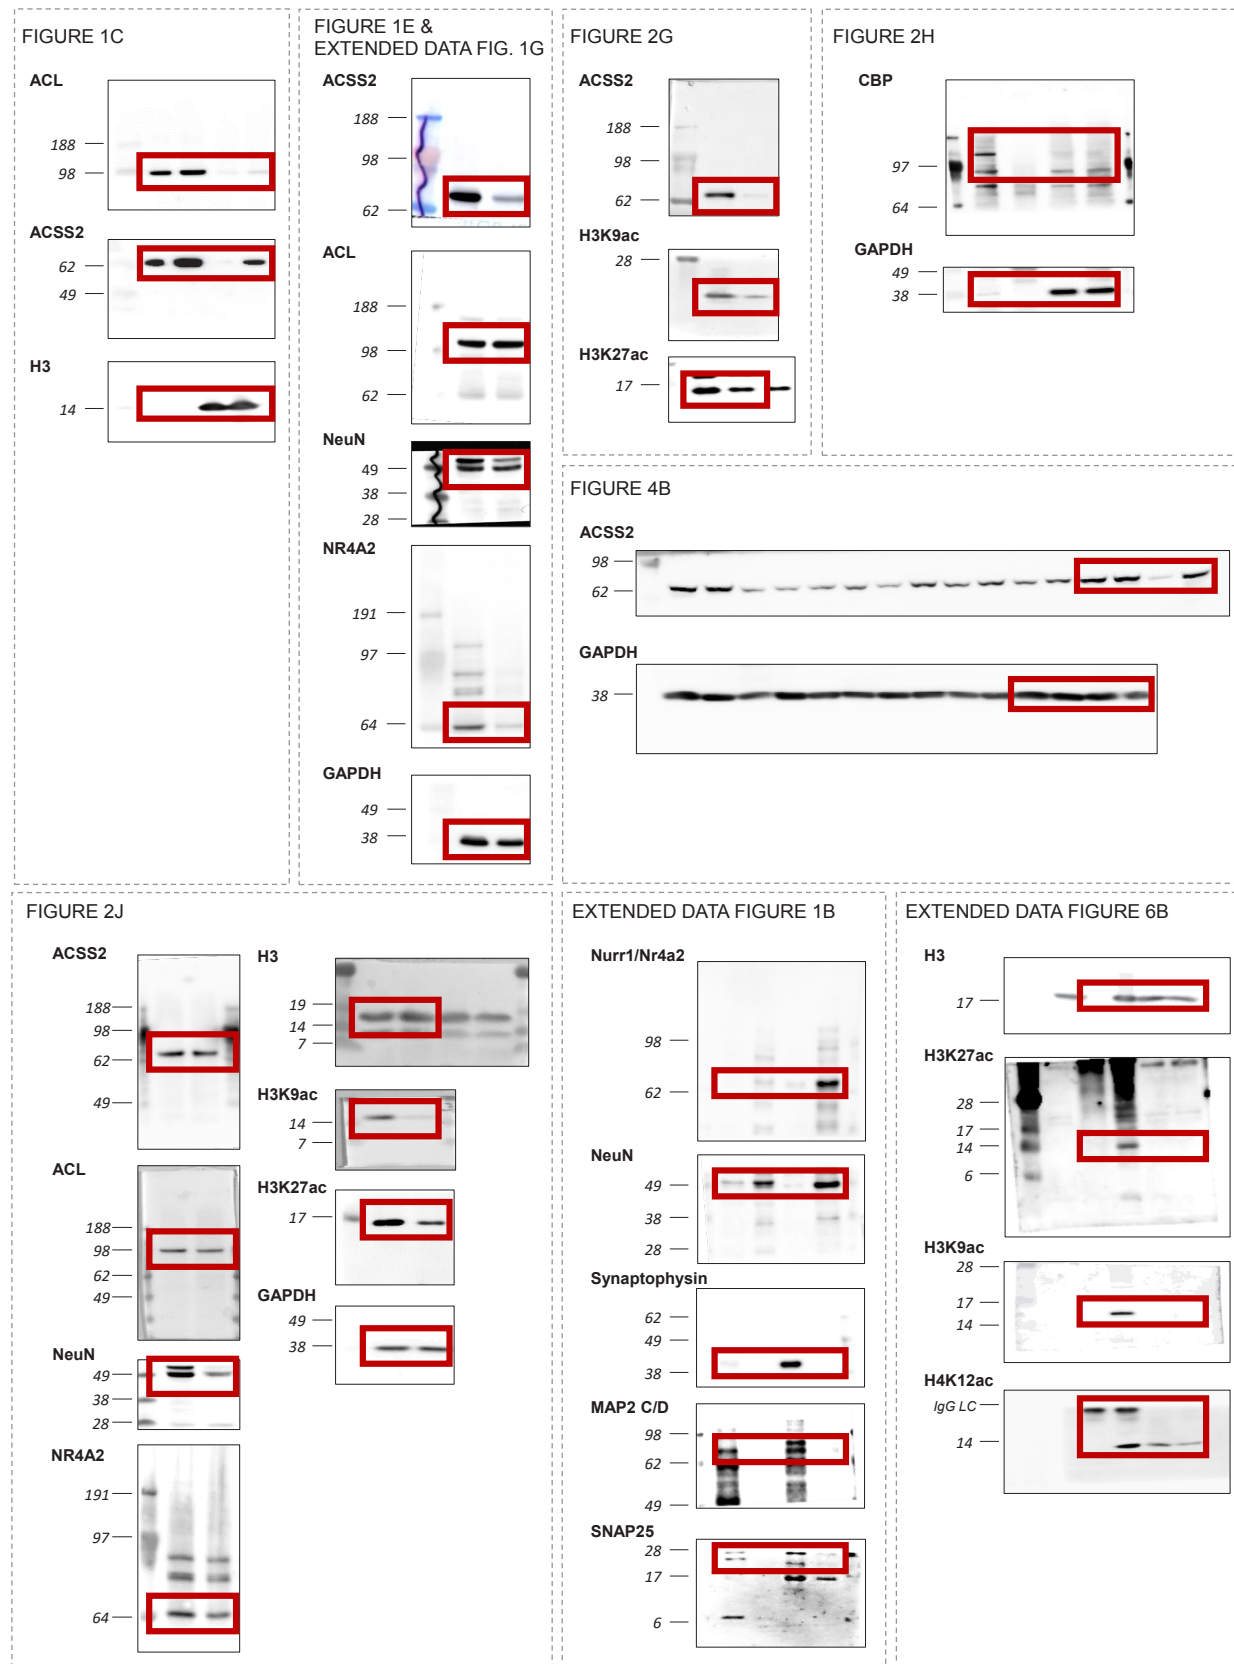

Supplement: 41586_2017_BFnature22405_MOESM1_ESM.pdf [file 41586_2017_BFnature22405_MOESM1_ESM.pdf]
